# Supplementary material
Source: publisher site journal article supplement (https://www.dovepress.com/article/291801)
Supplement: Supplementary file 1 [file get_supplementary_file.php]

**Supplementary Figure 1. Swimmer plots depicting best RECISTv1.1 response and duration of time on treatment.** Individual patients are represented by horizontal bars on the Y-axis and duration of time on treatment is depicted in months on the X-axis. Sixty one of 82 patients had at least one post-baseline scan and were evaluable for response. **A**. Results for dose escalation patients (N=35); **B.** Results for dose expansion patients (N=26).


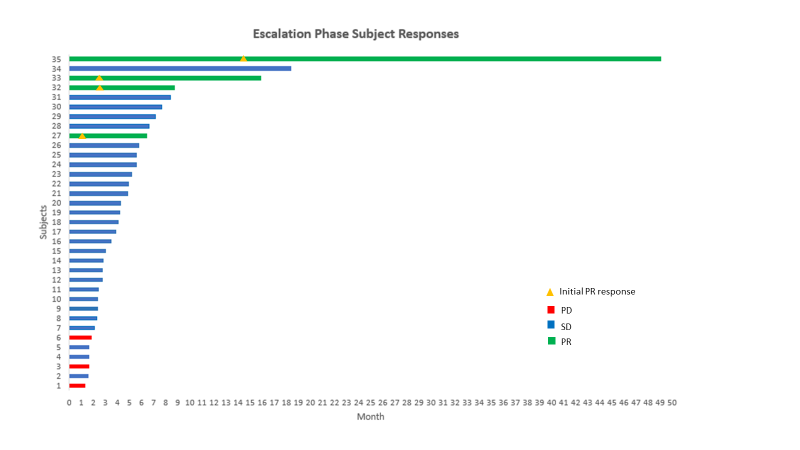


**A.**


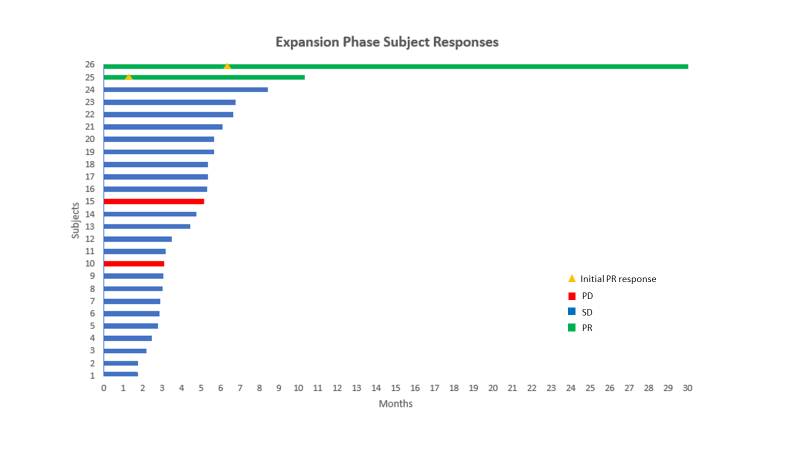


**B.**
